# Supplementary material
Source: MDPI journal article supplement (https://www.mdpi.com/2071-1050/15/11/8811)
Supplement: s1 [file s1]

# Supplementary Materials: Anti-scale Performance and Mechanism of Valonia Tannin Extract for Calcium Carbonate in Circulating Cooling Water System

Zhenbo He <sup>1</sup>, Li Zhang <sup>1, \*</sup>, Lihong Wang <sup>1</sup>, Qiang Zhang <sup>2</sup> and Lingyu Luan <sup>1, \*</sup>

<sup>1</sup> Qilu University of Technology (Shandong Academy of Sciences), Shandong Analysis and Test Centre, Jinan, 250014, China

<sup>2</sup> Center for Soil Pollution Control of Shandong, Jinan, 250012, China

\* Correspondence L Z: zlsatc@qlu.edu.cn;

\* Correspondence LY L: sdily916@126.com;

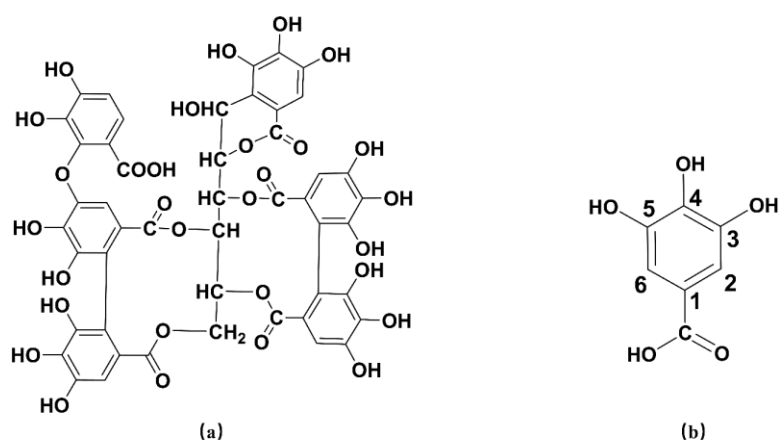

**Figure S1.** The typical structures of valonia tannin extract (a) along with its representative unit structural (b).

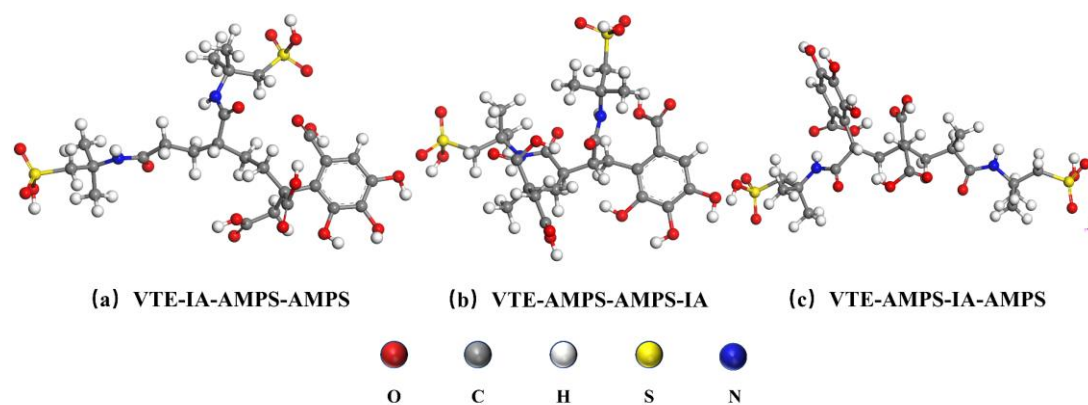

**Figure S2.** Three random molecular structures of MVTE. (a) VTE-IA-AMPS-IA; (b) VTE-AMPS-AMPS-IA; (c) VTE-IA-AMPS-AMPS.

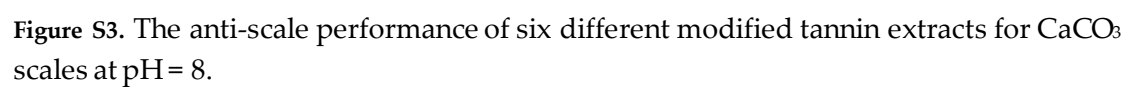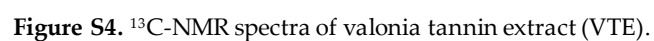

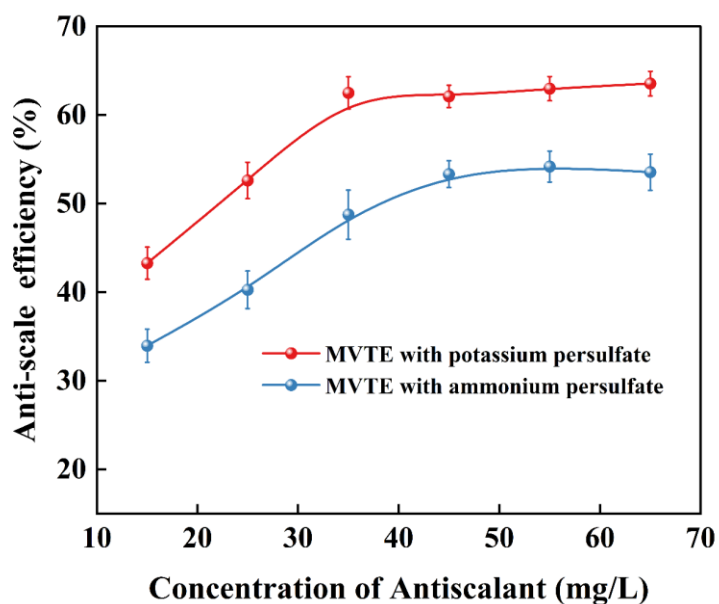

**Figure S5.** The anti-scale performance of modified valonia tannin extract (MVTE) with either ammonium persulfate or potassium persulfate against  $\text{CaCO}_3$  scales.

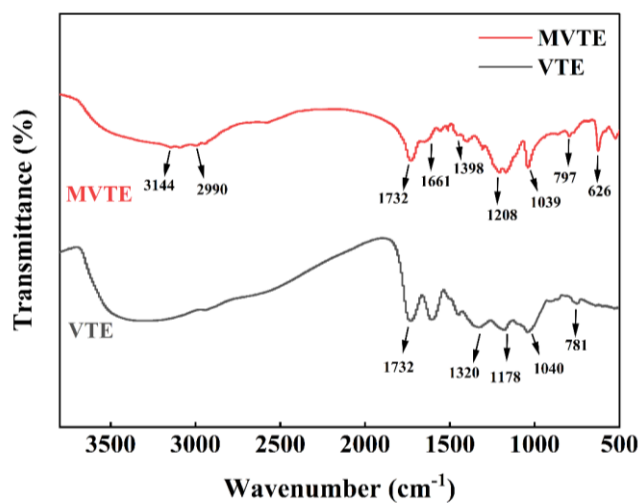

**Figure S6.** The FT-IR characterizations of MVTE and VTE.

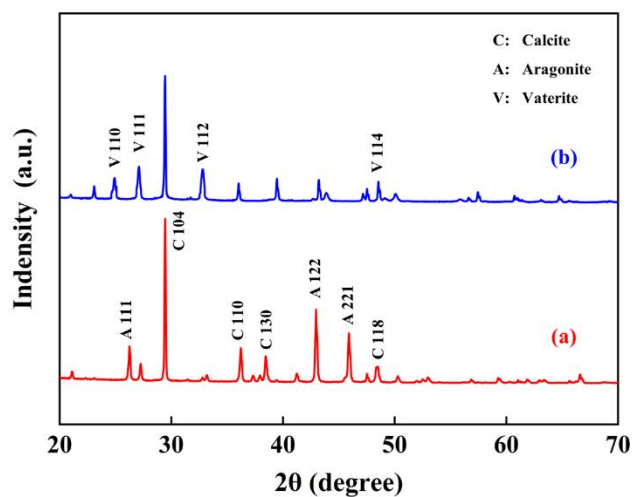

Figure S7. XRD patterns of  $\text{CaCO}_3$ : (a) without and (b) with MVTE.

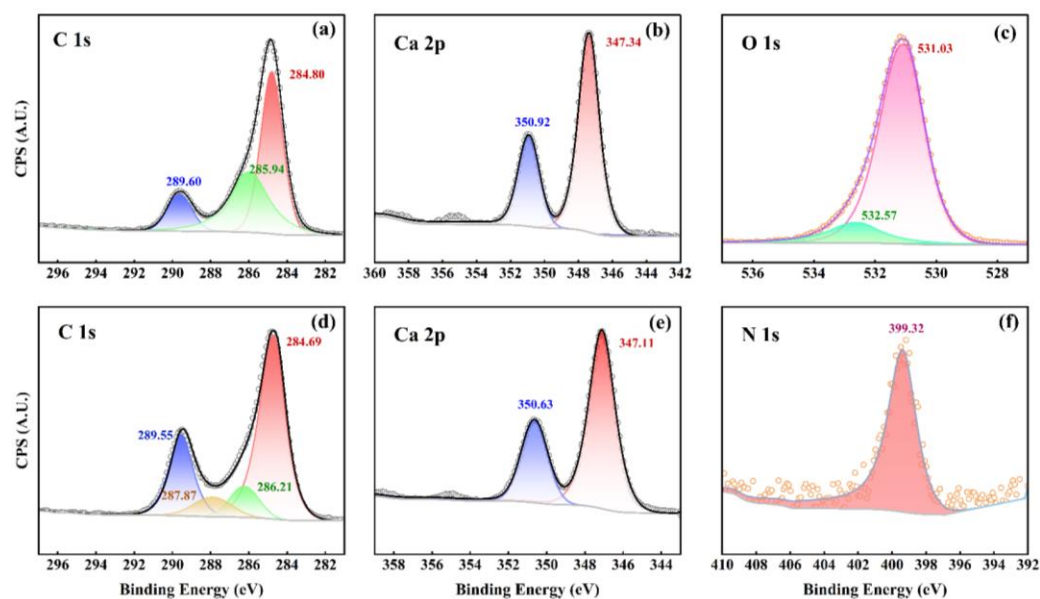

Figure S8. XPS spectra of  $\text{CaCO}_3$  in the blank: C 1s (a) and Ca 2p (b) as well as in the presence of 35 mg/L MVTE: C 1s (c), Ca 2p (d), O 1s (e), and N 1s (f).

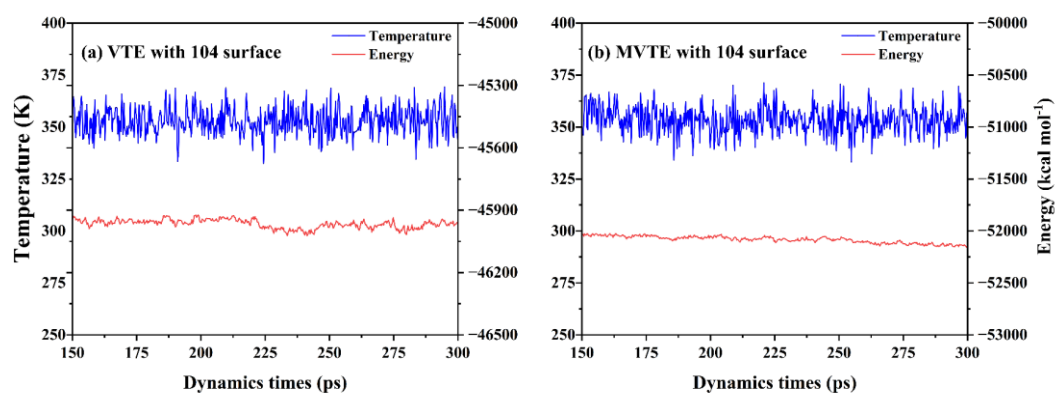

Figure S9. Energy fluctuation and temperature fluctuation of binding process of VTE (a), MVTE (b) onto

the (110) surface of calcite.

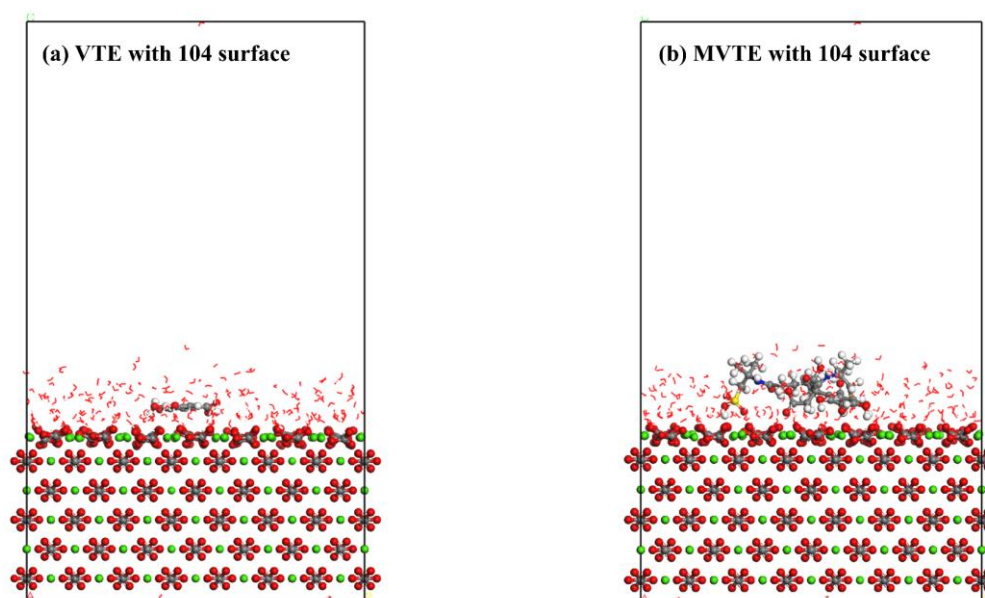

Figure S10. Equilibrium models of the VTE (a), MVTE (b) with (104) surface of calcite.

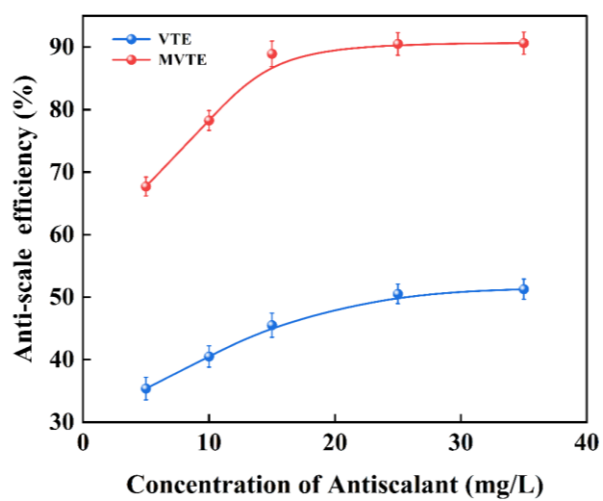

Figure S11 The anti-scale efficiency of VTE on  $\text{Ca}_3(\text{PO}_4)_2$ .

Table S1. The components of six common tannin extract.

| Category          | Tannin extracts | Content of tannin (%) | Content of non-tannin substance (%) |
|-------------------|-----------------|-----------------------|-------------------------------------|
| Condensed tannin  | Bayberry        | 70~72                 | 26~28                               |
|                   | Larch           | 55~57                 | 37~41                               |
|                   | Black-wattle    | 72~74                 | 18~22                               |
|                   | Quebracho       | 70~74                 | 8~12                                |
| Hydrolyzed tannin | Chestnut        | 68~72                 | 18~21                               |
|                   | Valonia         | 70~73                 | 17~23                               |

Table S2. The contents (%) of C, N and S of MVTE.

| Element           | C     | N    | S     |
|-------------------|-------|------|-------|
| Theoretical value | 40.86 | 4.56 | 10.24 |
| Estimate value    | 37.26 | 4.20 | 10.23 |

Table S3. Molecular weight of MVTE.

| Sample | Mw   | Mn   | PDI  |
|--------|------|------|------|
| MVTE   | 4776 | 3995 | 1.22 |

Text S1. Details of the  $^{13}\text{C}$ -NMR spectra of VTE.

For the  $^{13}\text{C}$ -NMR spectra of VTE(Figure S4), the peak at 171 ppm was relevant to the bands of C=O in gallic acid, the 144 ppm was assign to C<sub>3</sub> and C<sub>5</sub><sup>[1]</sup>. The peak at 168 ppm belonged to the carboxyl group of gallic acid, and the 136 ppm belonged to C<sub>4</sub><sup>[2]</sup>. Moreover, the peak at 124 ppm was responsible for C<sub>1</sub> of gallic acid<sup>[1]</sup>. Additionally, C<sub>2</sub> and C<sub>6</sub> of gallic acid were observed at 108 ppm, and the peak at 72 ppm was attributed to the C-O-C bridges of VTE<sup>[3]</sup>.

## References

- [1] Resins T formaldehyde, Li J, Li C, et al. Reactivity of Larch and Valonia Tannins in Synthesis of Tannin-Formaldehyde Resins[J]. *bioresources*, 2016, 11(1): 2256-2268.
- [2] Abdalla S, Pizzi A, Bahabri F, et al. Analysis of valonia oak (*Quercus aegylops*) acorn tannin and wood adhesives application[J/OL]. *BioResources*, 2015, 10(4): 7165-7177.
- [3] Kang SW, Kang K, Kim MA, et al. Phytoestrogenic activity of *Aceriphyllum rossii* and rapid identification of phytoestrogens by LC-NMR/MS and bioassay-guided isolation[J/OL]. *European Food Research and Technology*, 2014, 239(2): 237-246.
